# Supplementary material
Source: PubMed Central journal article supplement (PMC7948292)
Supplement: advancesADV2019000405-suppl1.pdf [file advancesADV2019000405-suppl1.pdf]

**Supplementary Table 1: Clinical Description of Studied Missense Variants**

| <b>Missense Variants (Legacy Position)</b> | <b>HGVS Position</b> | <b>Activity (relative to FIX-WT)</b> | <b>Antigen (relative to FIX-WT)</b> | <b>Genotype-Phenotype</b> | <b>Reference</b>                |
|--------------------------------------------|----------------------|--------------------------------------|-------------------------------------|---------------------------|---------------------------------|
| A148T                                      | 194                  | 1                                    | 1                                   | Polymorphism              | (Bezemer, Arellano et al. 2009) |
| V182L                                      | 228                  | 0.15                                 | 1.3                                 | HB causing                | (Taylor, Liddell et al. 1990)   |
| N264Y                                      | 310                  | 0.25                                 | 0.25                                | HB causing                | (Weinmann, Murphy et al. 1998)  |
| H268R                                      | 314                  | 0.06                                 | 0.02                                | HB causing                | (Costa, Ernault et al. 2000)    |
| R338L                                      | 384                  | 6.6                                  | 0.78                                | Thrombophilia             | (Simioni, Tormene et al. 2009)  |
| T376N                                      | 442                  | 0.15                                 | 0.13                                | HB causing                | (Green, Montandon et al. 1991)  |

**Supplementary Table 2: Characteristics of pediatric thrombosis patients evaluated for F9 R338 substitutions (n=232)**

| <b>Characteristic</b>          | <b>Percent<sup>†</sup></b> |
|--------------------------------|----------------------------|
| <b>Age</b>                     |                            |
| <1                             | 20.7                       |
| 1-6                            | 10.1                       |
| 6-13                           | 12.8                       |
| 13-18                          | 45.7                       |
| ≥18                            | 10.6                       |
| <b>Sex</b>                     |                            |
| Male                           | 55.7                       |
| Female                         | 44.3                       |
| <b>Catheter-related</b>        | <b>28</b>                  |
| <b>Inherited thrombophilia</b> |                            |
| Antithrombin Deficiency        | 6                          |
| Protein C Deficiency           | 9                          |
| Protein S Deficiency           | 9                          |
| Factor V-Leiden                | 9                          |
| Prothrombin Gene Mutation      | 4                          |

<sup>†</sup>Subjects not tested or missing data removed from denominator

**Supplementary Table 3: Summary of negative screenings for FIX R338 thrombophilias**

| <b>Thrombosis<br/>Subjects<br/>(N)</b> | <b>Controls<br/>(N)</b> | <b>Age<br/>(years)</b> | <b>Notes</b> | <b>Reference</b>                  |
|----------------------------------------|-------------------------|------------------------|--------------|-----------------------------------|
| 200                                    | 200                     | 20-80                  | Italy        | (Simioni, Tormene et al. 2009)    |
| 19                                     | 132                     | adults                 | Brazil       | (Mazetto, Orsi et al. 2010)       |
| 201                                    |                         | adults                 | Holland      | (Koenderman, Bertina et al. 2011) |
| 115                                    | 115                     | 20-83                  | Italy        | (Campello, Spiezia et al. 2013)   |
| 232                                    |                         | 0.01-25                | CHOP         | <i>This work</i>                  |
| <b>Total</b>                           | <b>767</b>              | <b>447</b>             |              |                                   |

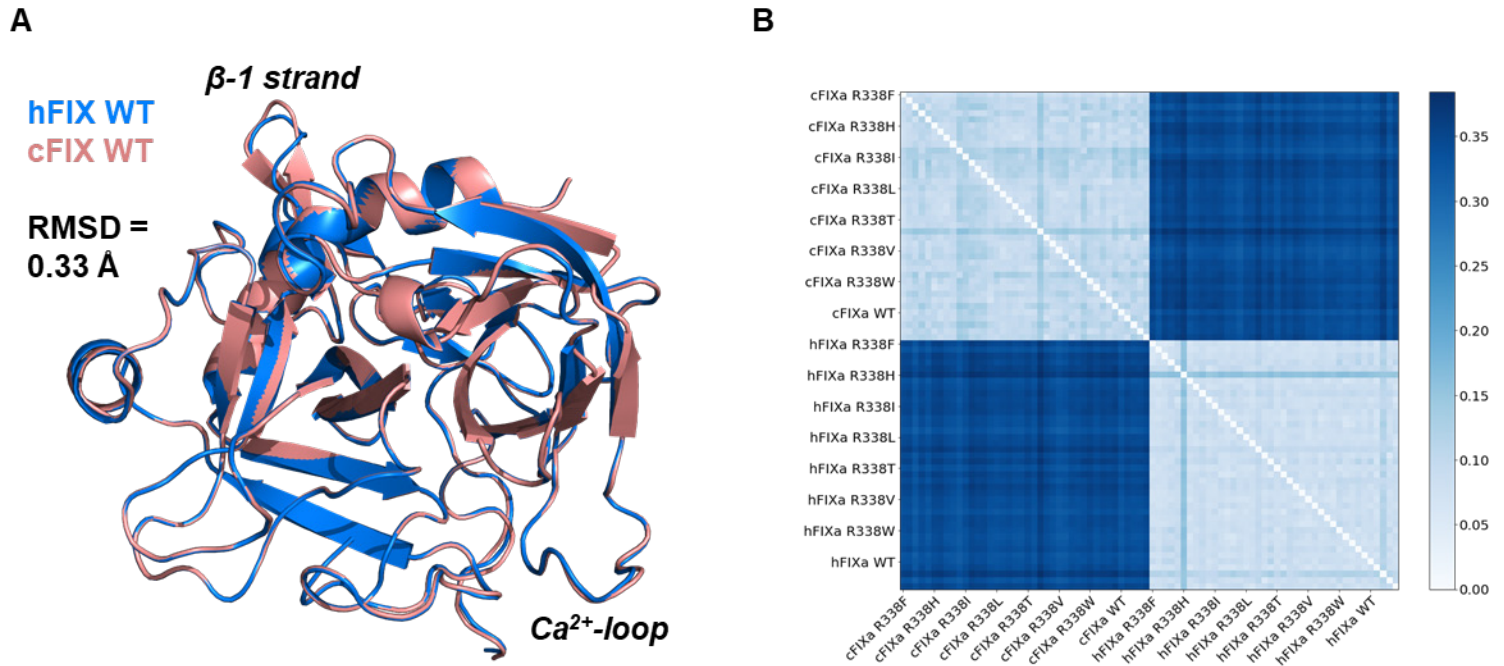

**Supplementary Figure 1: Homology modeling of hFIX and cFIX variants.** (A) Superimposition of the top scoring homology models of hFIX-WT and cFIX-WT. Though predicted structures are overall highly similar, there are minor differences in the  $\beta$ 1-strand and the calcium-binding loop. (B) Pairwise RMSD (Å) comparisons between homology models of hFIX-WT and cFIX-WT variants. Deviations are higher between cFIX and hFIX models than within cFIX or hFIX models. 100 homology models were developed for each variant using the RosettaCM (Song, DiMaio et al. 2013) using the crystal structure of hFIXa-WT (PDB# 1RFN) as the template structure. The top five scoring structures for each variant were used for comparison.

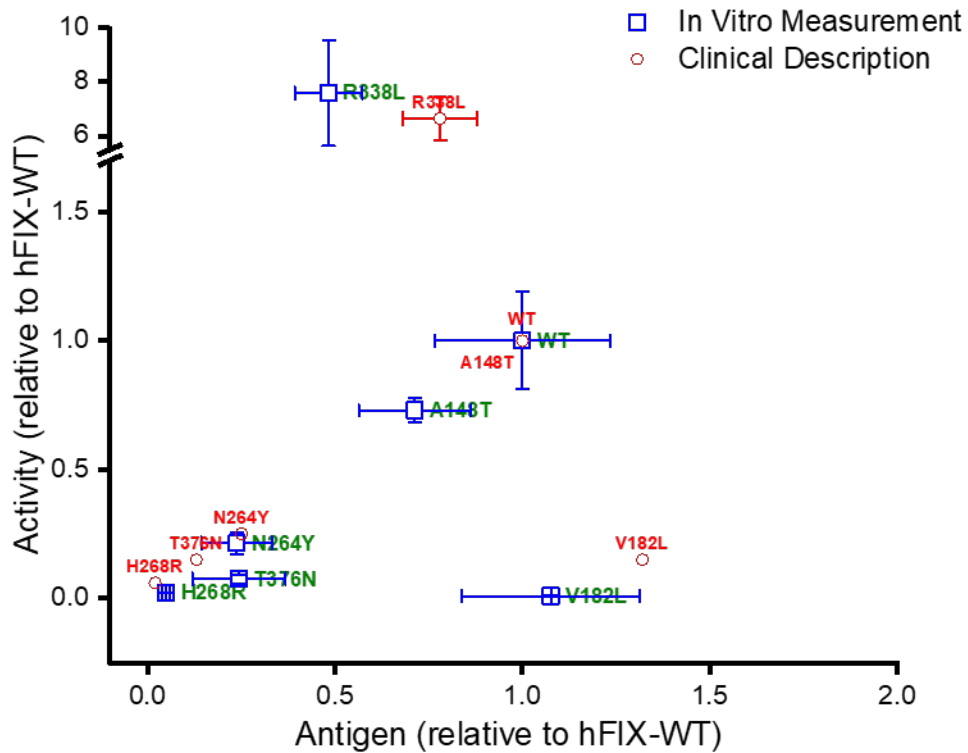

**Supplementary Figure 2: Comparison of clinically described FIX missense variants with recombinant FIX variants.** FIX variants with clinically described activity and antigen levels (red circles) listed in Supplementary Table 1 were expressed in HEK293 cells and the activity and antigen levels were measured from conditioned media (blue squares). HB causing missense variants with a range of expression levels were selected. A148T is the Malmo polymorphism. Blue points represent the activity and antigen of  $\geq 3$  independent transient transfections and errors bars represent  $\pm$  SEM.

**A**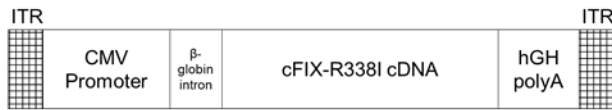**B**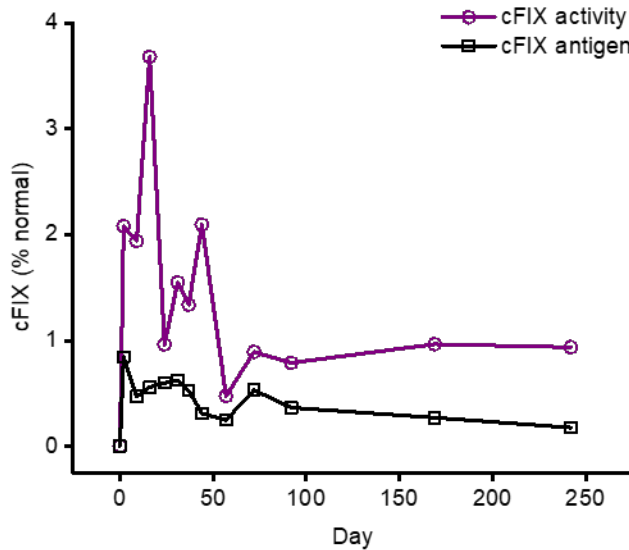**C**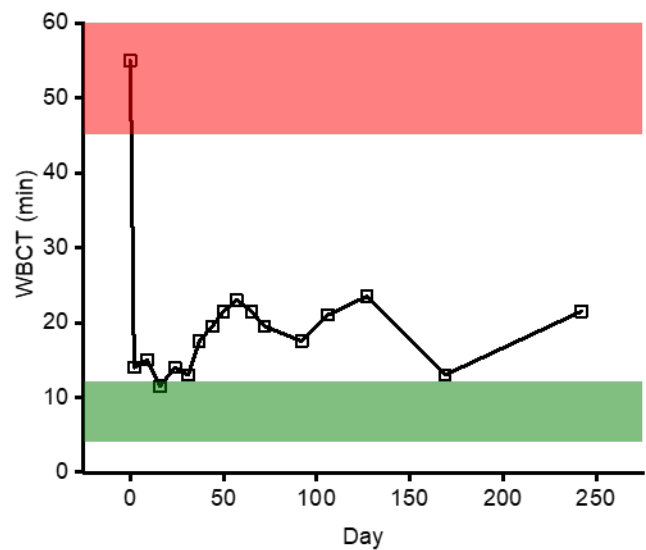

**Supplementary Figure 3: Gene therapy with AAV6-cFIX-R3381 in HB dogs.** (A) Schematic of vector used in study. One adult male HB dog (N40) was administered  $3 \times 10^{12}$  vg/kg AAV6-cFIX-R3381 by peripheral transvenular delivery to the skeletal muscle. (B) cFIX activity (circles) and antigen (squares) over time after vector administration. (C) Whole blood clotting time after vector administration; hemophilia (>45 min) and normal (8 – 12 min) range indicated by red and green box respectively. No FIX inhibitor was detected. There was also no local or systemic toxicity.

## **Supplementary References**

Bezemer, I. D., A. R. Arellano, C. H. Tong, C. M. Rowland, H. A. Ireland, K. A. Bauer, J. Catanese, P. H. Reitsma, C. J. Doggen, J. J. Devlin, F. R. Rosendaal and L. A. Bare (2009). "F9 Malmo, factor IX and deep vein thrombosis." Haematologica **94**(5): 693-699.

Campello, E., L. Spiezia, C. Bulato, S. Gavasso, B. Woodhams and P. Simioni (2013). "Factor IX activity/antigen ratio and the risk of first unprovoked venous thromboembolism." Thromb Haemost **109**(4): 755-756.

Costa, J. M., P. Ernault, D. Vidaud, M. Vidaud, D. Meyer and J. M. Lavergne (2000). "Fast and efficient mutation detection method using multiplex PCR and cycle sequencing--application to haemophilia B." Thromb Haemost **83**(2): 244-247.

Green, P. M., A. J. Montandon, R. Ljung, D. R. Bentley, I. M. Nilsson, S. Kling and F. Giannelli (1991). "Haemophilia B mutations in a complete Swedish population sample: a test of new strategy for the genetic counselling of diseases with high mutational heterogeneity." Br J Haematol **78**(3): 390-397.

Koenderman, J. S., R. M. Bertina and M. C. De Visser (2011). "Factor IX-R338L (Factor IX Padua) screening in a Dutch population of sibpairs with early onset venous thromboembolism." Thrombosis Research **128**.

Mazetto, B. M., F. L. A. Orsi, T. B. Mello, E. V. dePaula and J. M. Annichino-Bizzacchi (2010). "Prevalence of Factor IX-R338L (Factor IX Padua) in a cohort of patients with venous thromboembolism and mild elevation of factor IX levels." Thrombosis Research **126**: e165.

Simioni, P., D. Tormene, G. Tognin, S. Gavasso, C. Bulato, N. P. Iacobelli, J. D. Finn, L. Spiezia, C. Radu and V. R. Arruda (2009). "X-linked thrombophilia with a mutant factor IX (factor IX Padua)." N Engl J Med **361**(17): 1671-1675.

Song, Y., F. DiMaio, R. Y.-R. Wang, D. Kim, C. Miles, T. Brunette, J. Thompson and D. Baker (2013). "High-resolution comparative modeling with RosettaCM." Structure **21**(10): 1735-1742.

Taylor, S. A., M. B. Liddell, I. R. Peake, A. L. Bloom and D. P. Lillicrap (1990). "A mutation adjacent to the beta cleavage site of factor IX (valine 182 to leucine) results in mild haemophilia Bm." Br J Haematol **75**(2): 217-221.

Weinmann, A. F., M. E. Murphy and A. R. Thompson (1998). "Consequences of factor IX mutations in 26 families with haemophilia B." Br J Haematol **100**(1): 58-61.
